# Supplementary material for: Levers and Barriers to Vaccinate against COVID-19 in the Multicultural Context of French Guiana: A Qualitative Cross-Sectional Survey among Health Care Workers
Source: MDPI journal article supplement (doi:10.3390/vaccines9111216), 2021-10-20
Supplement: s1 [file s1]

## QUESTIONNAIRE ON VACCINAL INTENTION OF HEALTH CARE WORKERS IN FRENCH GUIANA

Questions 2 to 5 are have been subject to a previous publication: Vignier et al, Vaccines, 2021.  
<https://doi.org/10.3390/vaccines9060682>

### 1. Socio-demographic data

1.1) How old are you?

- ☐ 18-34 years old
- ☐ 35-49 years old
- ☐ 50-64 years old
- ☐ 65 and over

1.2) You are :

- ☐ A man
- ☐ A woman

1.3) Where were you born?

- ☐ French Guiana
- ☐ Metropolitan France
- ☐ French West Indies
- ☐ Haiti
- ☐ Suriname
- ☐ Brazil
- ☐ Guyana
- ☐ Other:

1.4) What language do you speak most often in your family/home?

- ☐ French
- ☐ Guyanese Creole
- ☐ Haitian Creole
- ☐ West Indian Creole
- ☐ Portuguese
- ☐ Sranan tongo
- ☐ Amerindian language
- ☐ English
- ☐ Other: .....

1.5) How long have you lived in French Guiana?

1.6) What is your profession?

- ☐ Physician
  - ☐ If yes, what is your specialty :
- ☐ Nurse
- ☐ Caregiver
- ☐ Other, please specify :

1.7) What is your mode of practice?

- ☐ Liberal

- Health centre
  - Hospital
  - Other, please specify :
- 1.8) What is your municipality of practice :
- Cayenne agglomeration
  - Other coastal commune
  - Commune of the interior
- 1.9) In what year did you start practicing?

## 2. Opinion on vaccination in general

2.1) Do you support vaccination in general?

- Very favourable
- Somewhat favourable
- Somewhat unfavourable
- Not at all favorable
- Don't know
- Does not want to answer

2.1) Are you opposed to certain vaccinations in particular?

- Yes
  - If so, which ones?
- No
- Don't know
- Does not want to answer

2.2) Do you feel sufficiently informed about vaccination in general?

- Yes, it is
- Yes, rather
- No, not really
- No, not at all

2.3) Do you think you are up to date with your vaccinations?

- Yes
- No
- Don't know

2.4) Do you trust the information provided by the health authorities regarding vaccination in general (website, emails...)?

- Yes, it is
- Yes, rather
- No, not really
- No, not at all
- Don't know
- Does not want to answer

2.5) Do you fear adverse effects of vaccines in general?

- Yes, it is
- Yes, rather
- No, not really

- No, not at all
- Don't know
- Does not want to answer

2.7) Do you agree with the following information:

*"When I vaccinate, it is not only to protect myself but also to protect my patient and others."*

- Yes, it is
- Yes, rather
- No, not really
- No, not at all
- Don't know
- Does not want to answer

### **3. Concerning the flu vaccination**

3.1) Have you been vaccinated against the Flu in 2019-2020?

- Yes
- No
- Don't know/don't remember

3.2) Have you been vaccinated against the Flu in 2020-2021?

- Yes
- No
- Don't know/don't remember

3.3) Do you think the flu vaccine is effective?

- Yes, it is
- Yes, rather
- No, not really
- No, not at all
- Don't know
- Does not want to answer

3.4) Do you think the flu vaccine can cause serious side effects?

- Yes, it is
- Yes, rather
- Not so much
- No, not at all
- Don't know
- Does not want to answer

### **4. Regarding Covid-19**

4.1) Have you ever had the Covid-19?

- Yes, definitely (positive test)
- Yes, probably
- No
- Don't know

4.2) Have you been confronted with severe Covid-19 cases?

- Yes, among my patients

- Yes, among my circle of friends (family/work colleagues)
- No
- Don't know

4.3) Do you have any risk factors for severe disease other than your age?

- Yes
- No
- Don't know
- Does not want to answer

4.4) What is your level of concern about the Covid-19 epidemic?

- Very concerned
- Somewhat concerned
- Not really worried
- Not at all worried

4.5) What confidence do you have in the management of the health and economic crisis linked to COVID by the authorities?

- Total confidence
- Overall confidence
- Little confidence
- No confidence at all
- Don't know
- Does not want to answer

## 5. Regarding vaccination against Covid-19

5.1) Do you think you have been sufficiently informed about the Covid-19 vaccination?

- Yes, it is
- Yes, rather
- Not so much
- No, not at all
- Don't know
- Does not want to answer

5.2) Do you trust the information provided by the authorities on vaccination against Covid-19 (website, newsletters...)?

- Yes, it is
- Yes, rather
- Not so much
- No, not at all
- Don't know
- Does not want to answer

5.3) Do you have confidence in the laboratories that developed the first available vaccines?

- Yes, it is
- Yes, rather
- Not so much
- No, not at all
- Don't know

- Does not want to answer

5.4) How do you find out about vaccination?

- Official websites dedicated to vaccination, institutional newsletters
- Scientific articles to make my own opinion
- Discussions with trusted health professionals
- Discussions with family and/or friends
- Social networks, consumer sites
- Other, please specify :
- Don't know
- Not informed

5.5) Do you think that vaccines against Covid-19 are effective?

- Yes, it is
- Yes, rather
- Not so much
- No, not at all
  - Don't know
  - Does not want to answer

5.6) Are you particularly worried about certain types of vaccines?

- RNA vaccine, such as Pfizer or Moderna
- Viral vector vaccine, such as Astrazeneca
- Viral protein vaccine, like Sanofi and GSK
- Inactivated virus vaccine, such as Sinopharm (*in China for example*)
- DNA vaccine, like Inovio (NC)
- All types of Covid-19 vaccine
- No, not really
- No, not at all
- Don't know
- Does not want to answer

5.7) Are you concerned about serious side effects from these vaccines?

- Yes, it is
- Yes, rather
- No, not really
- No, not at all
- Don't know
- Does not want to answer

If yes, which ones?

5.8) Do you think there would be more adverse events with the Covid-19 vaccines compared to other existing vaccines?

- Yes, it is
- Yes, rather
- Not so much
- No, not at all
- Don't know

- Does not want to answer

5.9) Regarding vaccination against Covid19 :

- I am already vaccinated against Covid19
- I plan to get vaccinated for sure
- I'm probably considering getting the vaccine
- I am considering not getting vaccinated
- I'm sure I won't be vaccinated
- I haven't made my decision yet

5.10) What would motivate you most (or has motivated you) to get vaccinated? (*several answers possible*)

- To be sure that the vaccine prevents as many severe forms of the disease as possible
- Ensure that the vaccine minimizes transmission of the virus
- To be sure that the vaccine is effective
- Be sure that it has no or few adverse effects
- Ensure that vaccine recommendations are made with groups of health professionals and scientists who have no vested interest in the vaccine producers
- Wait for more vaccine recoil
- Another reason (specify \_\_\_\_\_)
- No argument is likely to change my mind

5.11) Do you think you would recommend vaccination to your relatives?

- Yes, certainly
- Yes, probably
- No, probably not
- No, certainly not
- Don't know

5.12) Do you recommend vaccination to your patients?

- Yes, it is
- Yes, rather
- No, not really
- No, not at all
- Don't know

5.13) If yes to the previous question, would you recommend vaccination against Covid-19 to a particular type of patient?

- Yes

If yes, which ones?

- No

5.14) Of the last 3 patients you talked to about the covid vaccine, how many were planning to get vaccinated?"

## 6. Open questions

6.1) Please detail the reasons why you are for or against vaccination against COVID-19?

6.2) Can you name three things essential to consider regarding COVID-19 vaccination in French Guiana "?"
